# Supplementary material
Source: publisher figshare collection journal article supplement (https://frontiersin.figshare.com/ndownloader/files/24161561)
Supplement: Supplementary file [file 24161561]

## *Supplementary Material*

### 1 Supplementary Figures and Tables

#### 1.1 Supplementary Figures

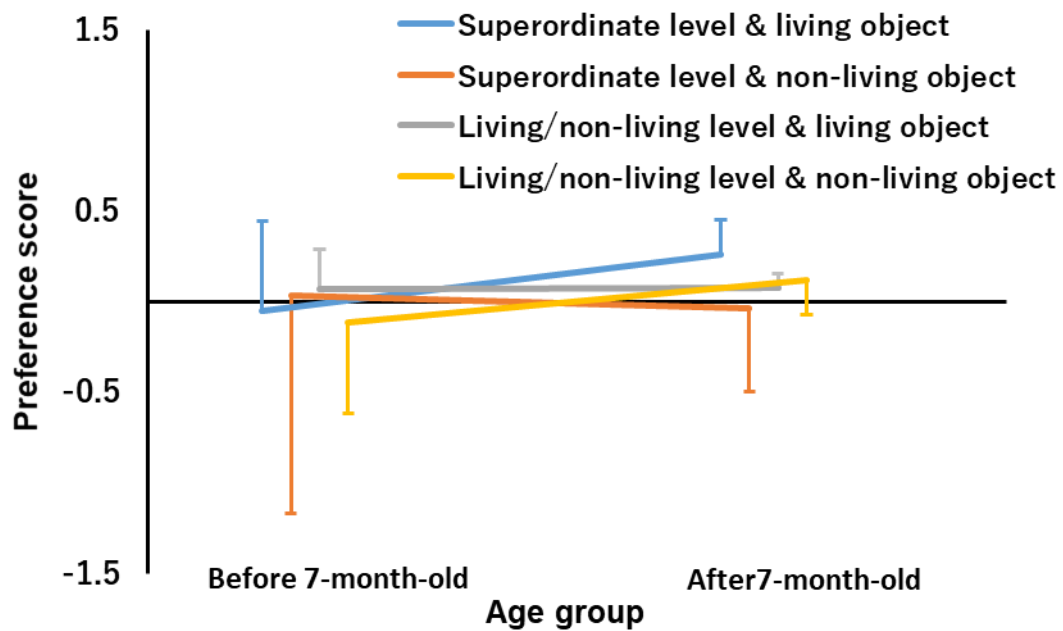

**Supplementary Figure 1.** The prediction from the linear mixed-model as a function of age group, category level, and living/nonliving object. Error bars indicate standard errors.
